# Supplementary material for: Control of Stimuli Sensitivity in pH-Switchable LCST/UCST-Type Thermosensitive Dendrimers by Changing the Dendrimer Structure
Source: MDPI journal article supplement (doi:10.3390/polym14122426), 2022-06-15
Supplement: s1 [file s1]

## Supplementary Information

### Control of Stimuli Sensitivity in pH-Switchable LCST/UCST-type Thermosensitive Dendrimers

Chie Kojima<sup>1,\*</sup>, Yunshen Fu<sup>1</sup>, and Mamiko Tamaki<sup>1</sup>

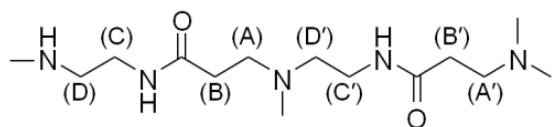

Figure S1. Partial dendrimer structure for assignment of the following <sup>1</sup>H NMR spectra.

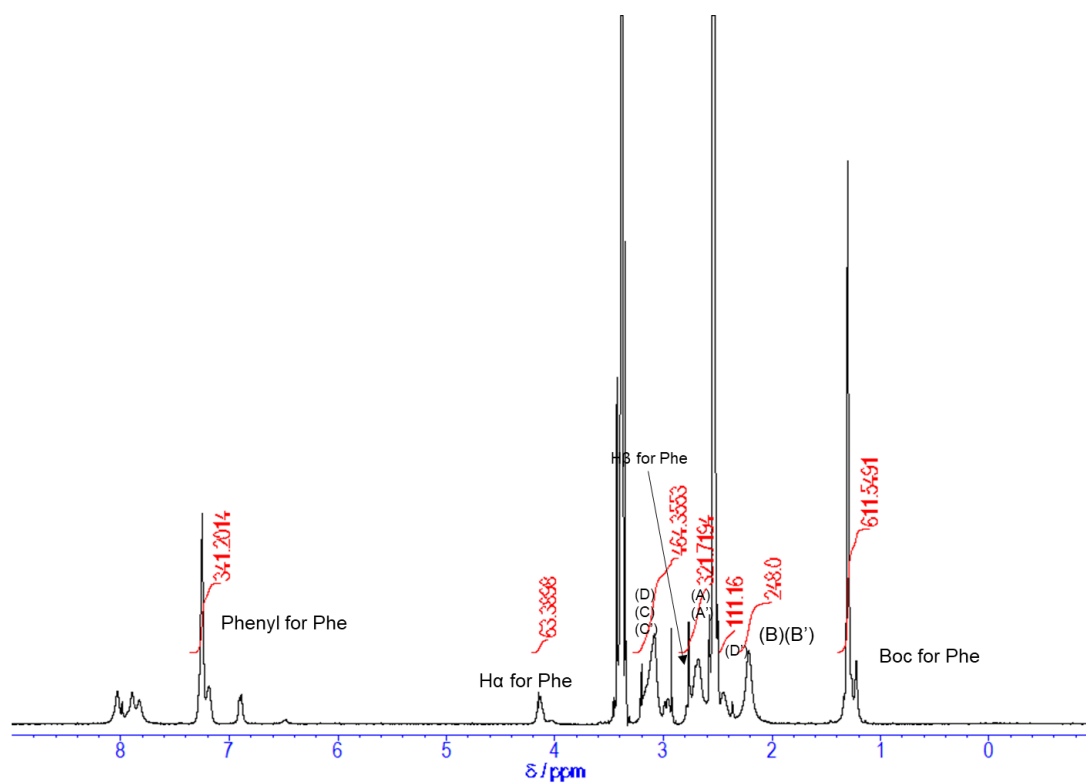

Figure S2. <sup>1</sup>H NMR spectrum of PAMAM-(Boc-Phe)<sub>64</sub> in DMSO-*d*<sub>6</sub>.

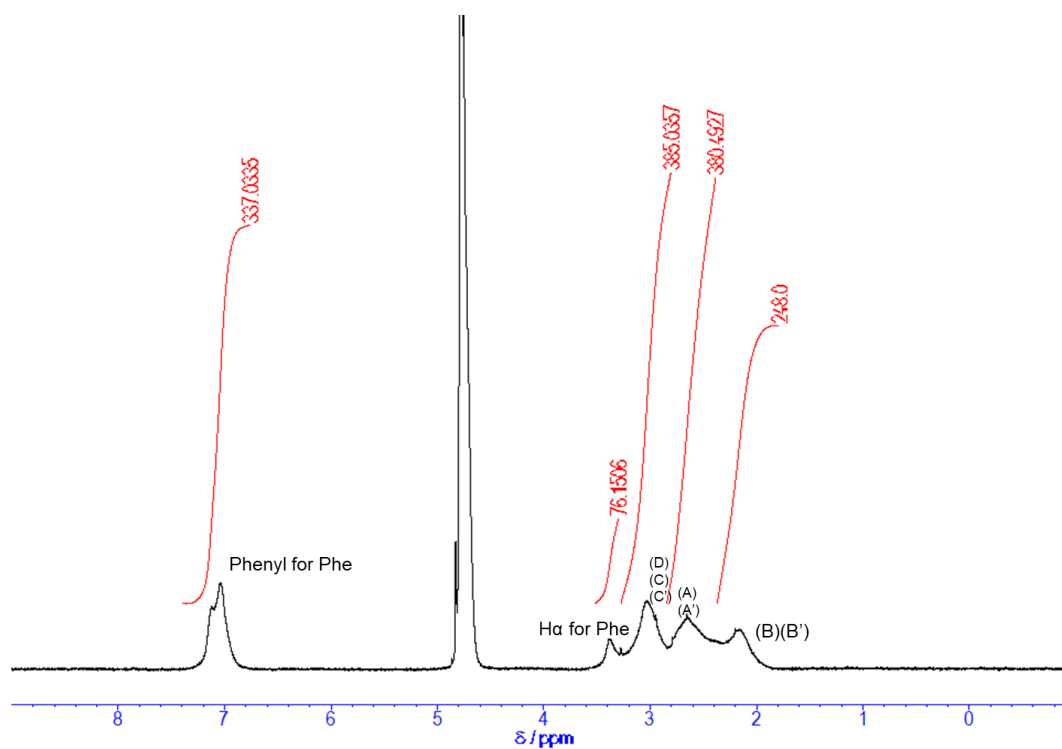

Figure S3. <sup>1</sup>H NMR spectrum of PAMAM-Phe64 in D<sub>2</sub>O.

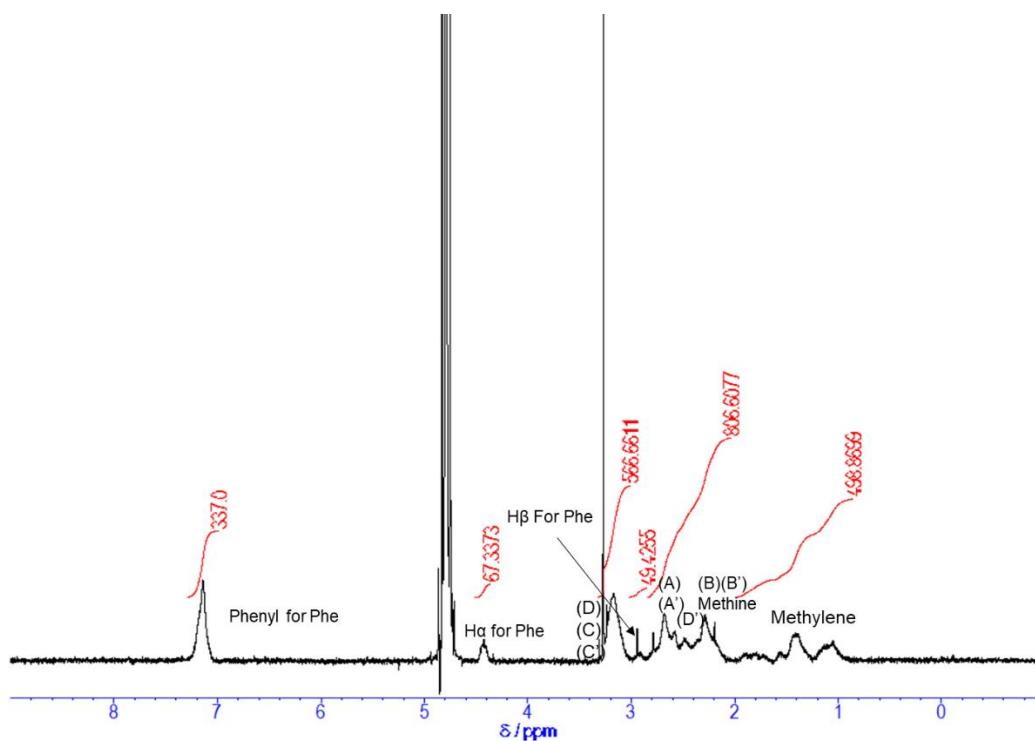

Figure S4. <sup>1</sup>H NMR spectrum of PAMAM-Phe64-CHex in D<sub>2</sub>O containing NaOD.

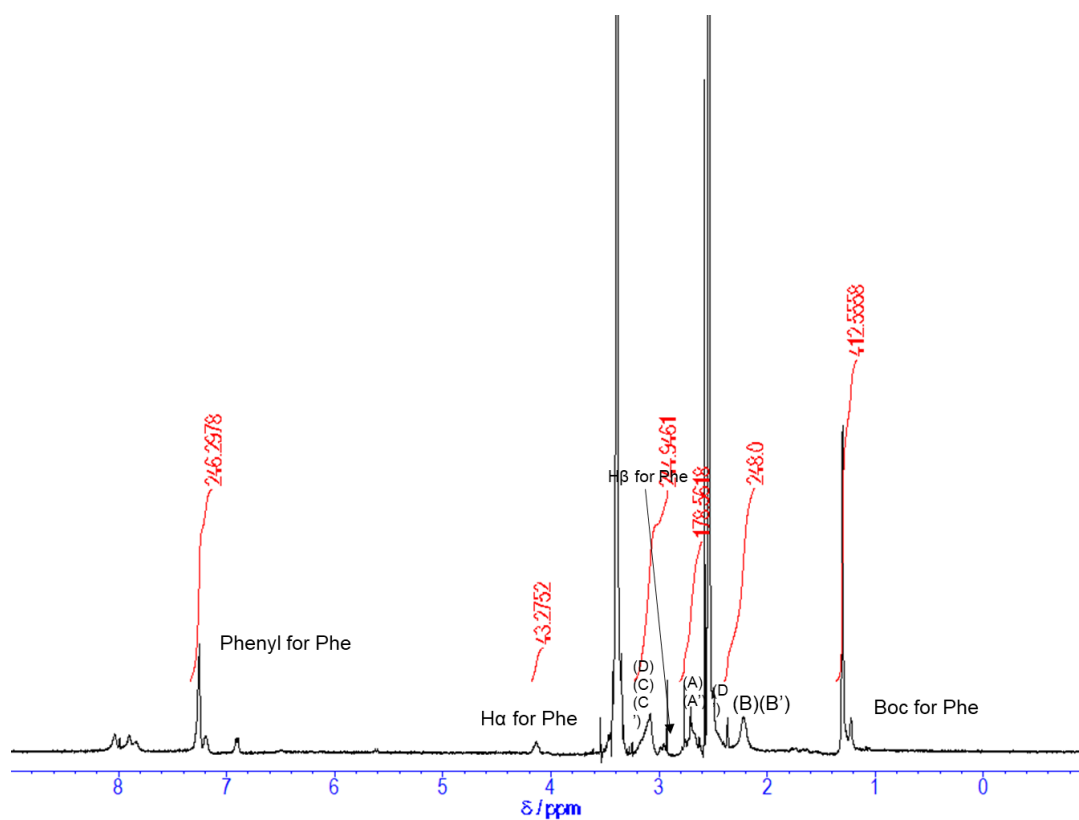

Figure S5.  $^1\text{H}$  NMR spectrum of PAMAM-(Boc-Phe)<sub>46</sub> in DMSO- $d_6$ .

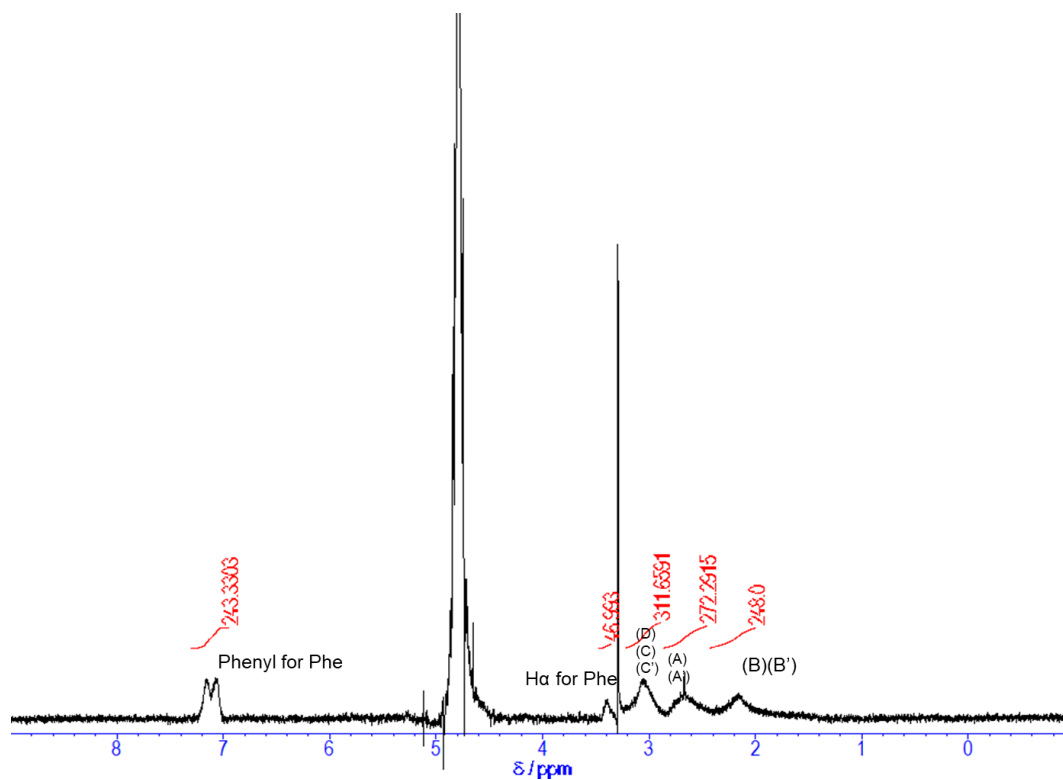

Figure S6.  $^1\text{H}$  NMR spectrum of PAMAM-Phe<sub>46</sub> in D<sub>2</sub>O.

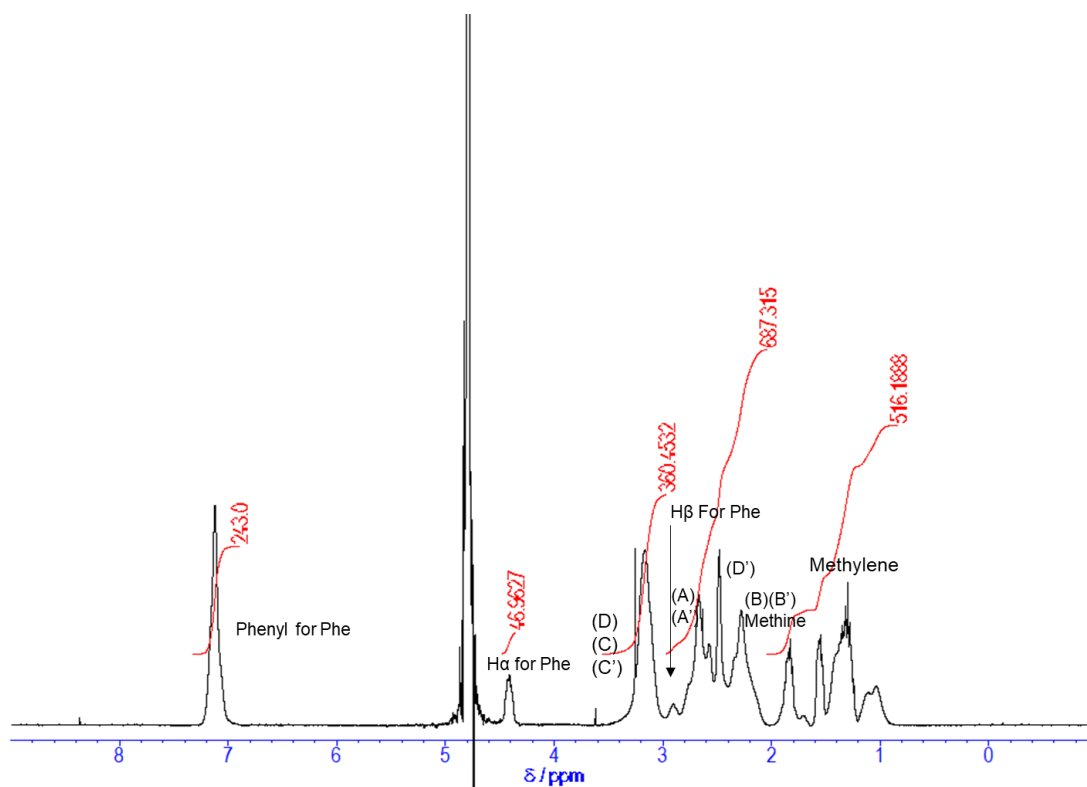

Figure S7.  $^1\text{H}$  NMR spectrum of PAMAM-Phe46-CHex in  $\text{D}_2\text{O}$  containing NaOD.

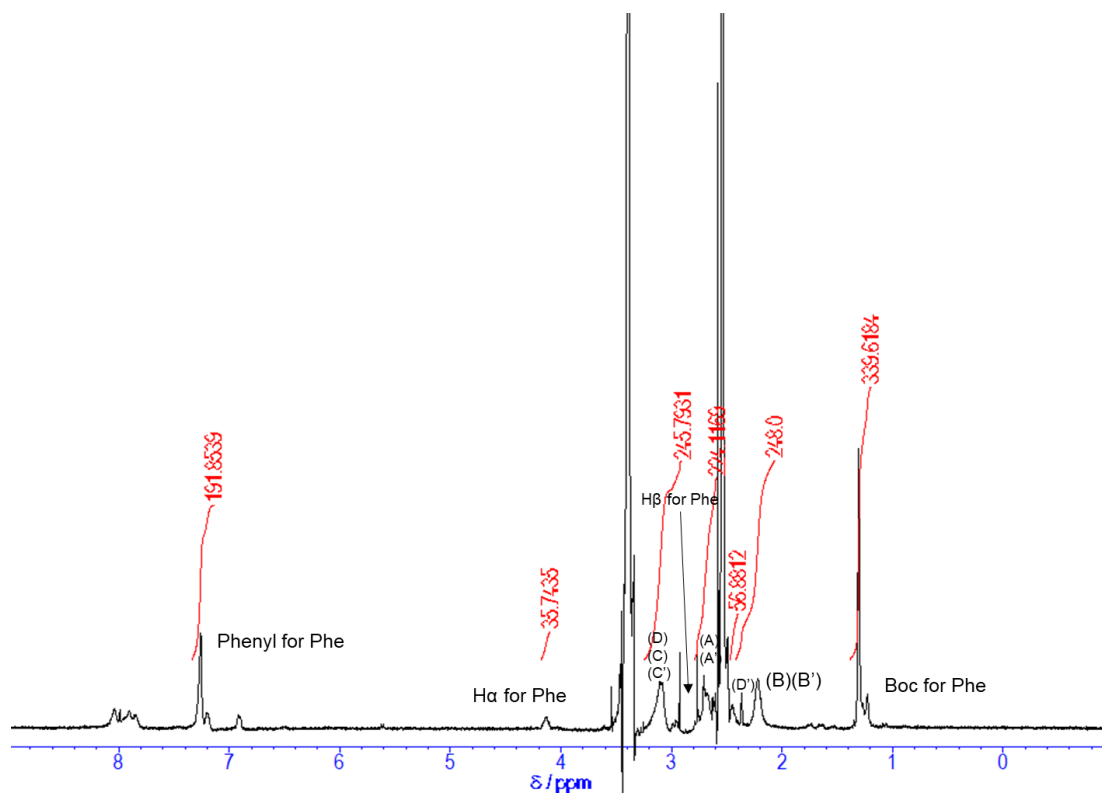

Figure S8.  $^1\text{H}$  NMR spectrum of PAMAM-(Boc-Phe)35 in  $\text{DMSO}-d_6$ .

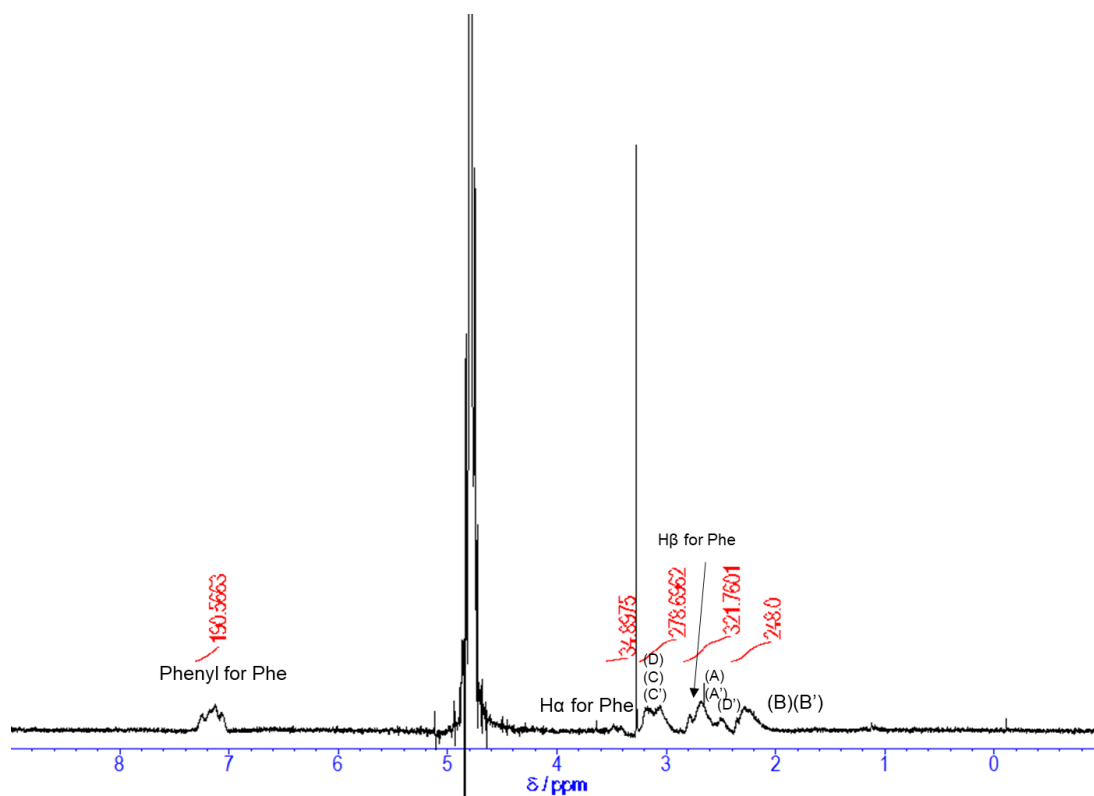

Figure S9. <sup>1</sup>H NMR spectrum of PAMAM-Phe35 in D<sub>2</sub>O.

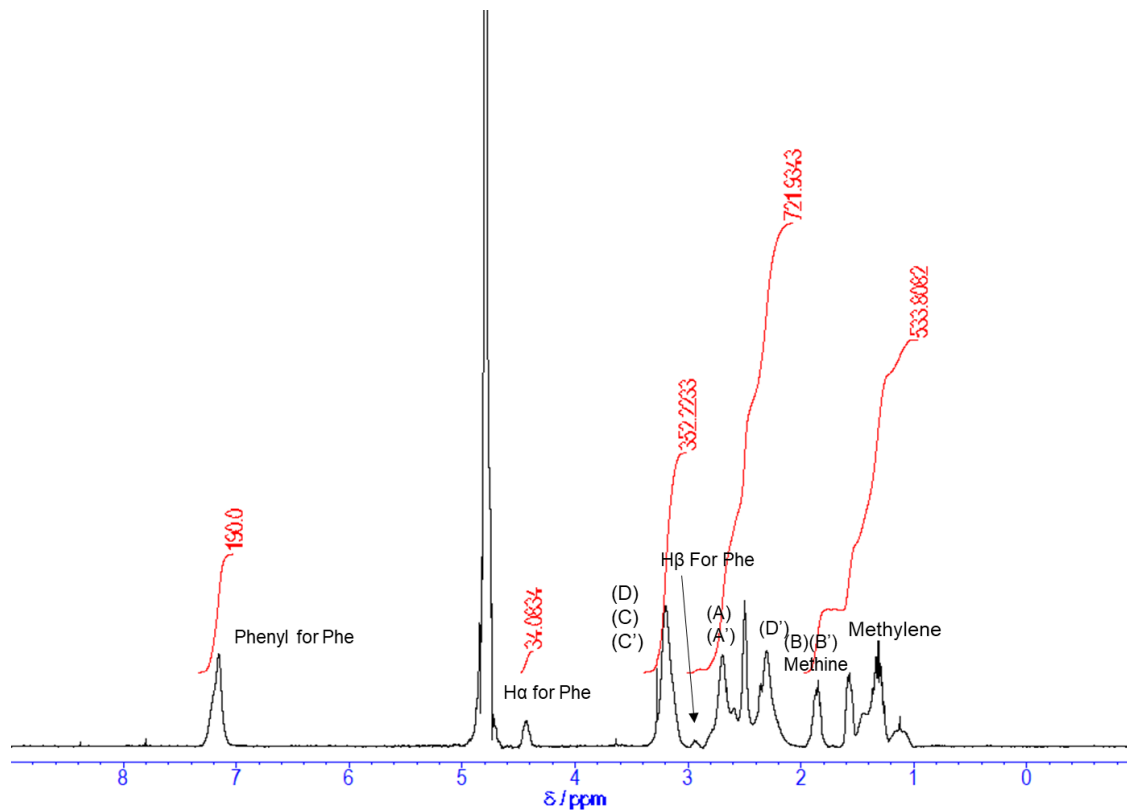

Figure S10. <sup>1</sup>H NMR spectrum of PAMAM-Phe35-CHex in D<sub>2</sub>O containing NaOD.

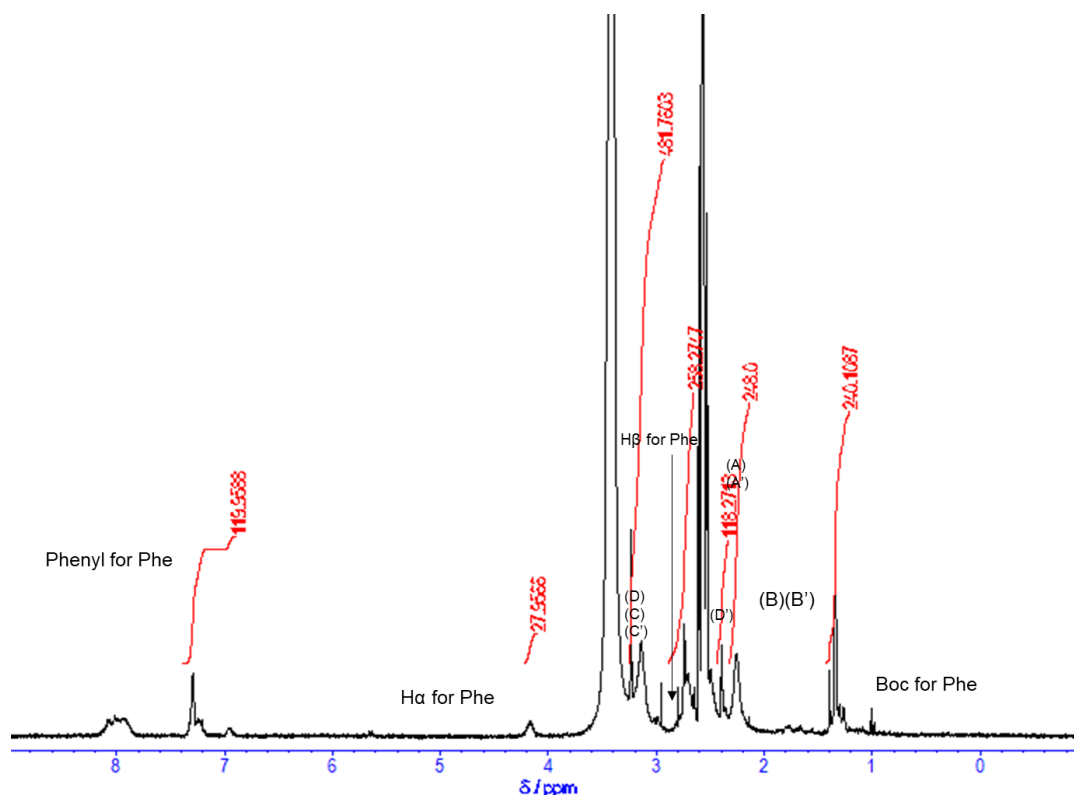

Figure S11. <sup>1</sup>H NMR spectrum of PAMAM-(Boc-Phe)<sub>27</sub> in DMSO-*d*<sub>6</sub>.

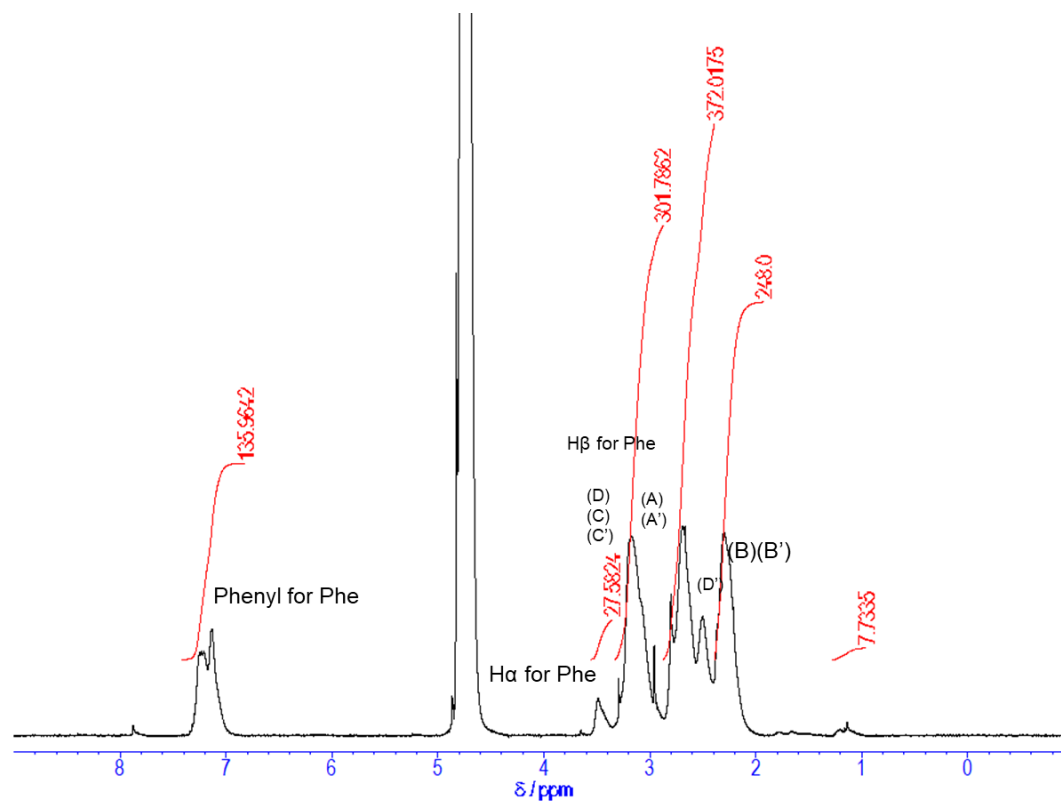

Figure S12. <sup>1</sup>H NMR spectrum of PAMAM-Phe<sub>27</sub> in D<sub>2</sub>O.

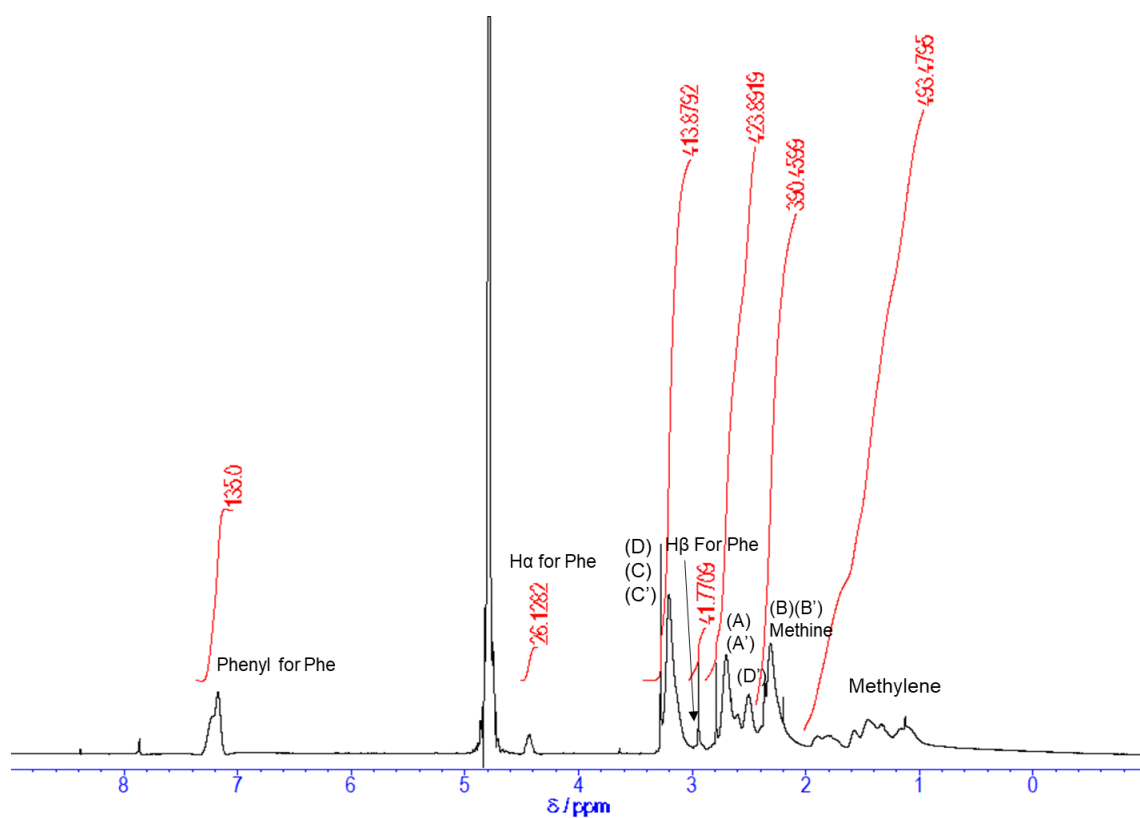

Figure S13. <sup>1</sup>H NMR spectrum of PAMAM-Phe<sub>27</sub>-CHex in D<sub>2</sub>O containing NaOD.

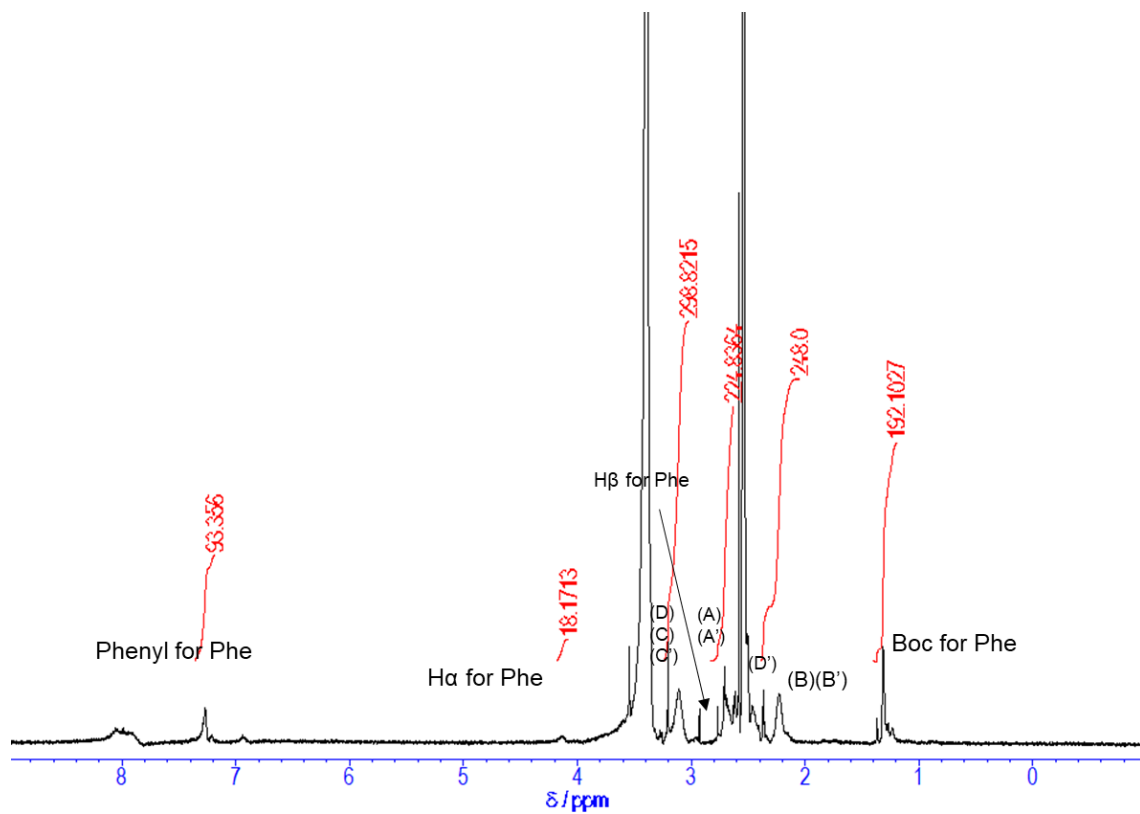

Figure S14. <sup>1</sup>H NMR spectrum of PAMAM-(Boc-Phe)<sub>16</sub> in DMSO-*d*<sub>6</sub>.

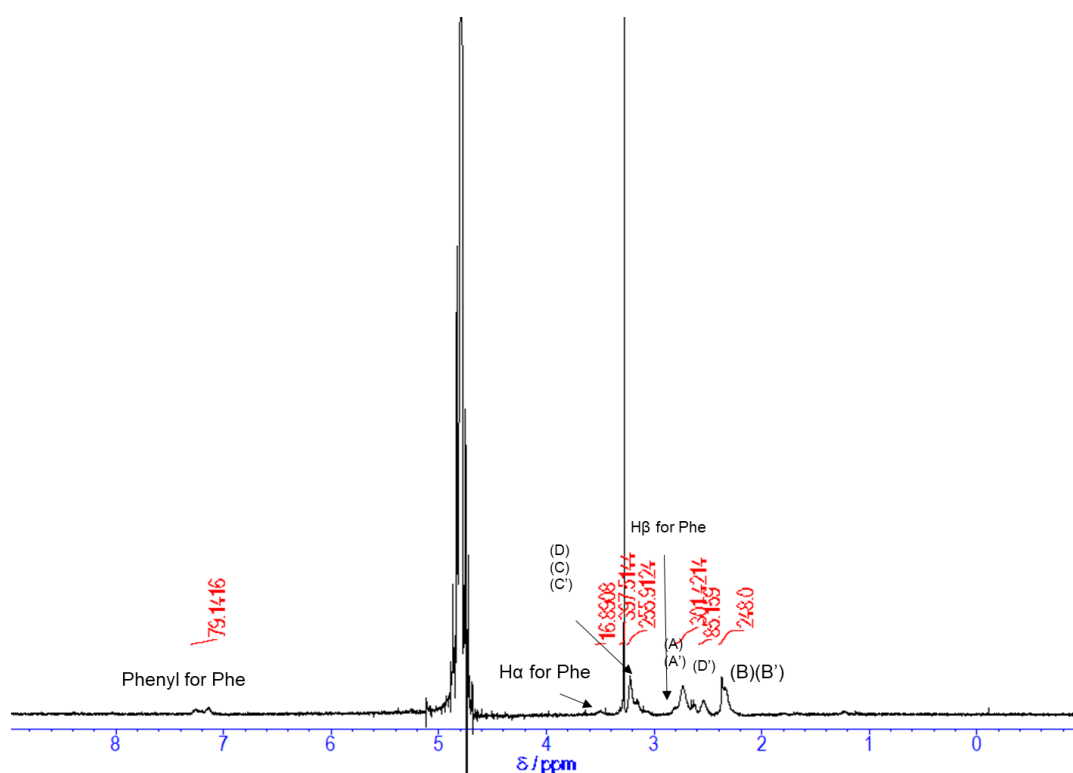

Figure S15. <sup>1</sup>H NMR spectrum of PAMAM-Phe16 in D<sub>2</sub>O.

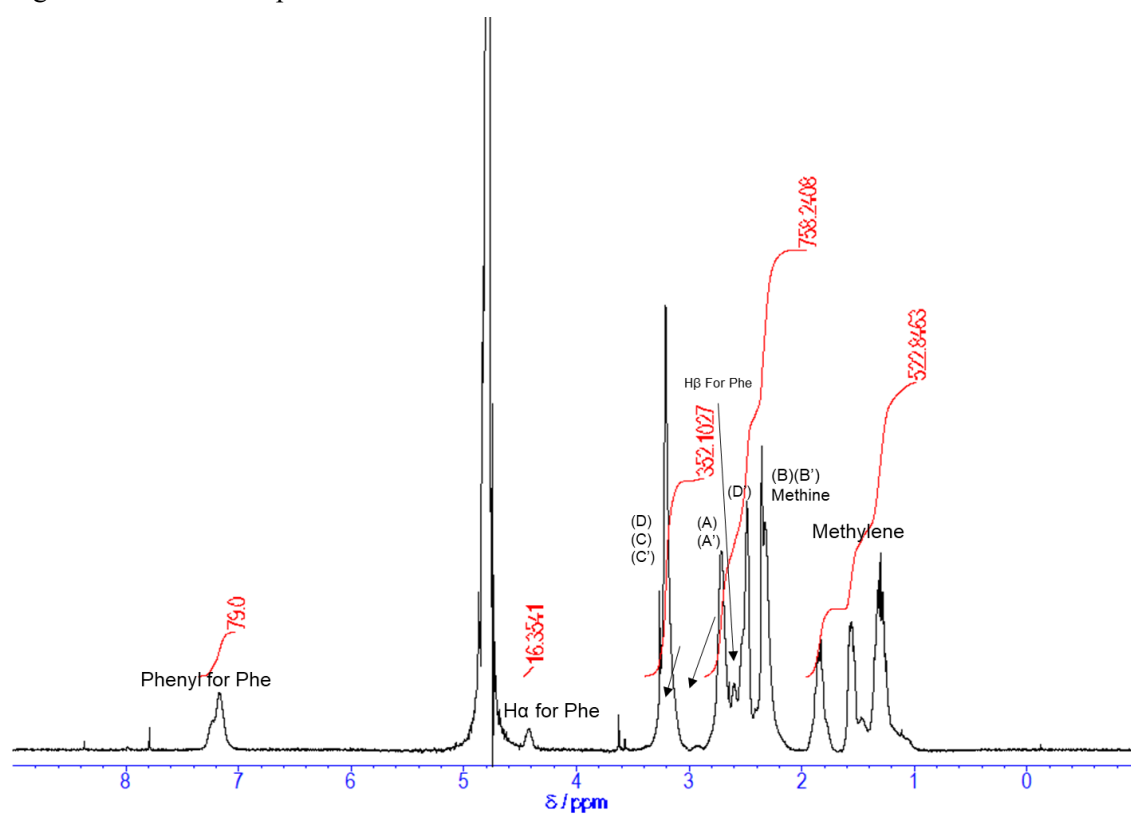

Figure S16. <sup>1</sup>H NMR spectrum of PAMAM-Phe16-CHex in D<sub>2</sub>O containing NaOD.



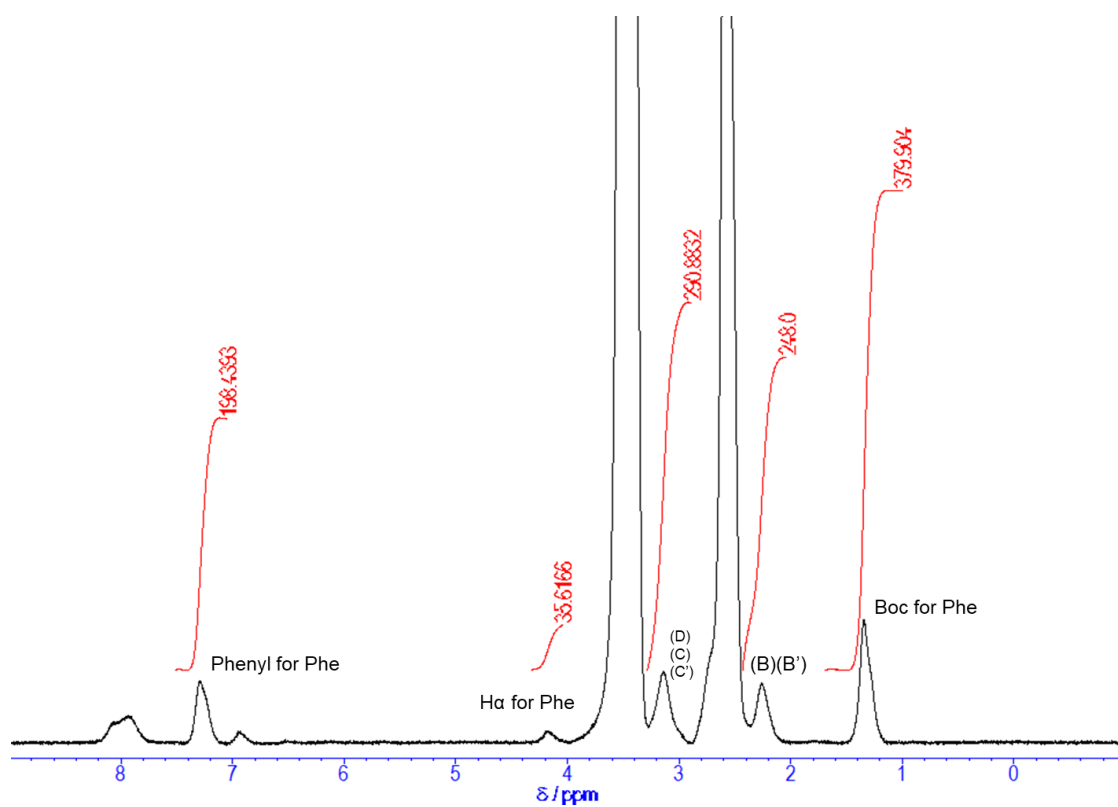

Figure S17. <sup>1</sup>H NMR spectrum of PAMAM-(Boc-Phe)37 in DMSO-*d*<sub>6</sub>.

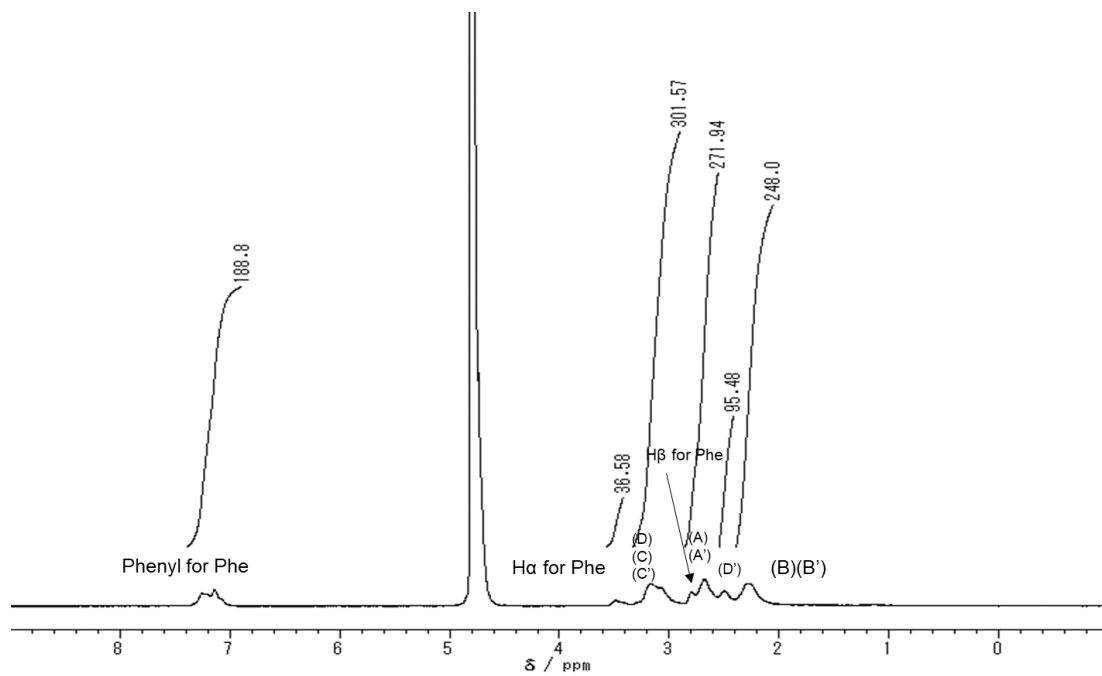

Figure S18. <sup>1</sup>H NMR spectrum of PAMAM-Phe37 in D<sub>2</sub>O.

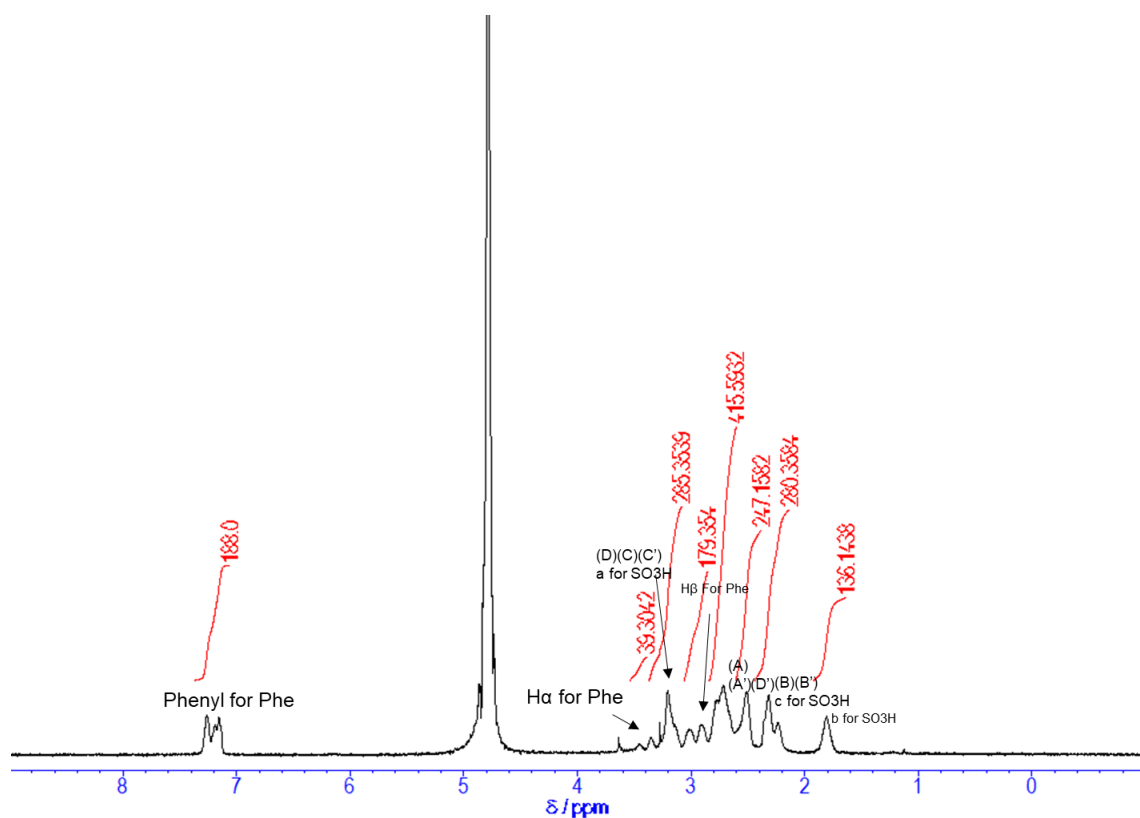

Figure S19.  $^1\text{H}$  NMR spectrum of PAMAM-Phe37-SO<sub>3</sub>Na68 in D<sub>2</sub>O containing NaOD.

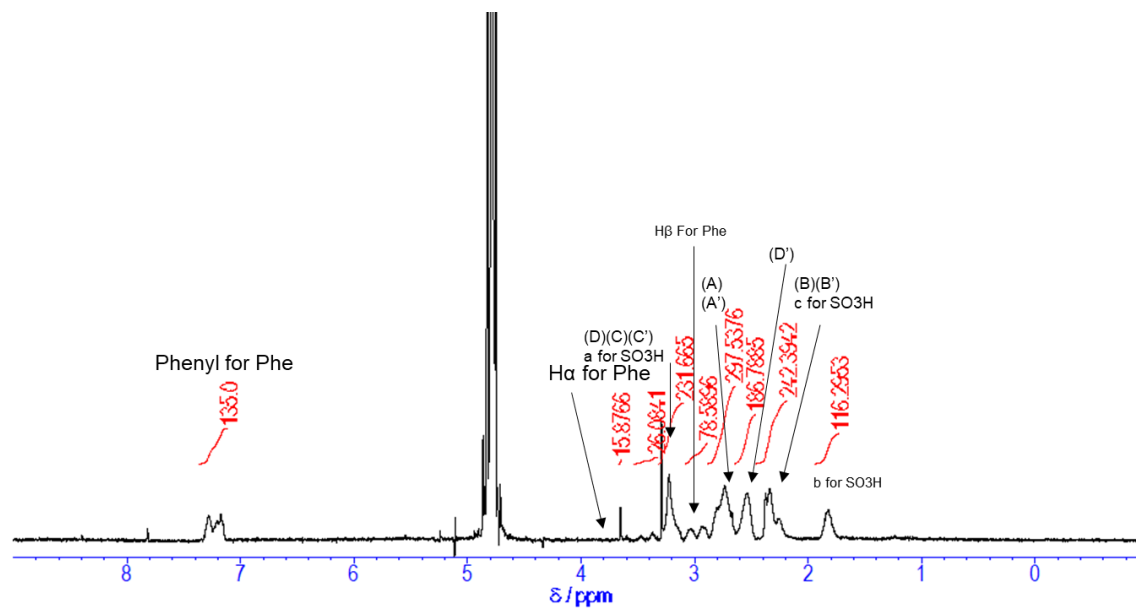

Figure S20.  $^1\text{H}$  NMR spectrum of PAMAM-Phe27-SO<sub>3</sub>Na61 in D<sub>2</sub>O containing NaOD.

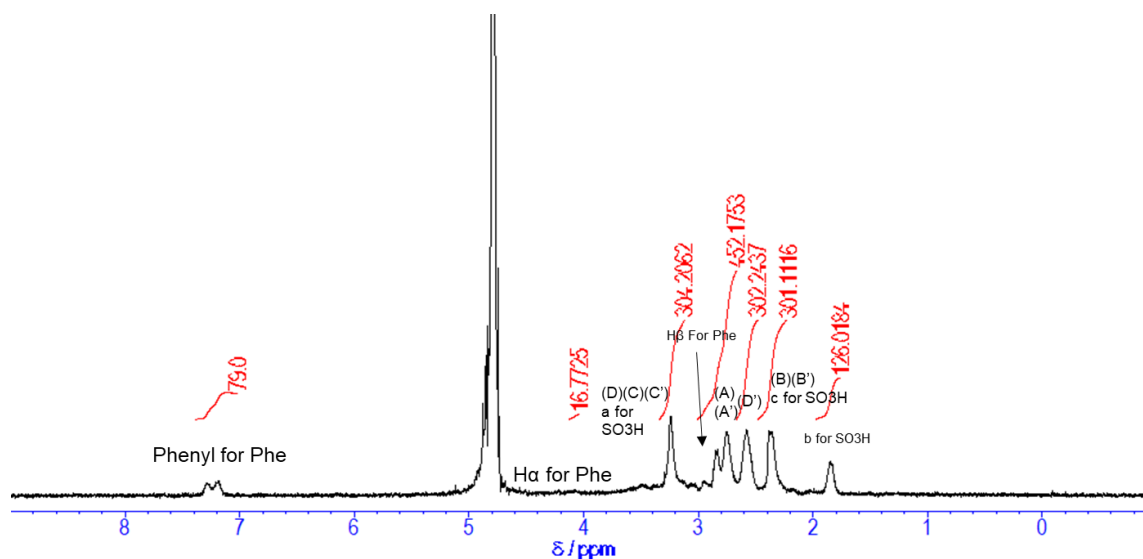

Figure S21.  $^1\text{H}$  NMR spectrum of PAMAM-Phe16- $\text{SO}_3\text{Na}$ 62 in  $\text{D}_2\text{O}$  containing NaOD.

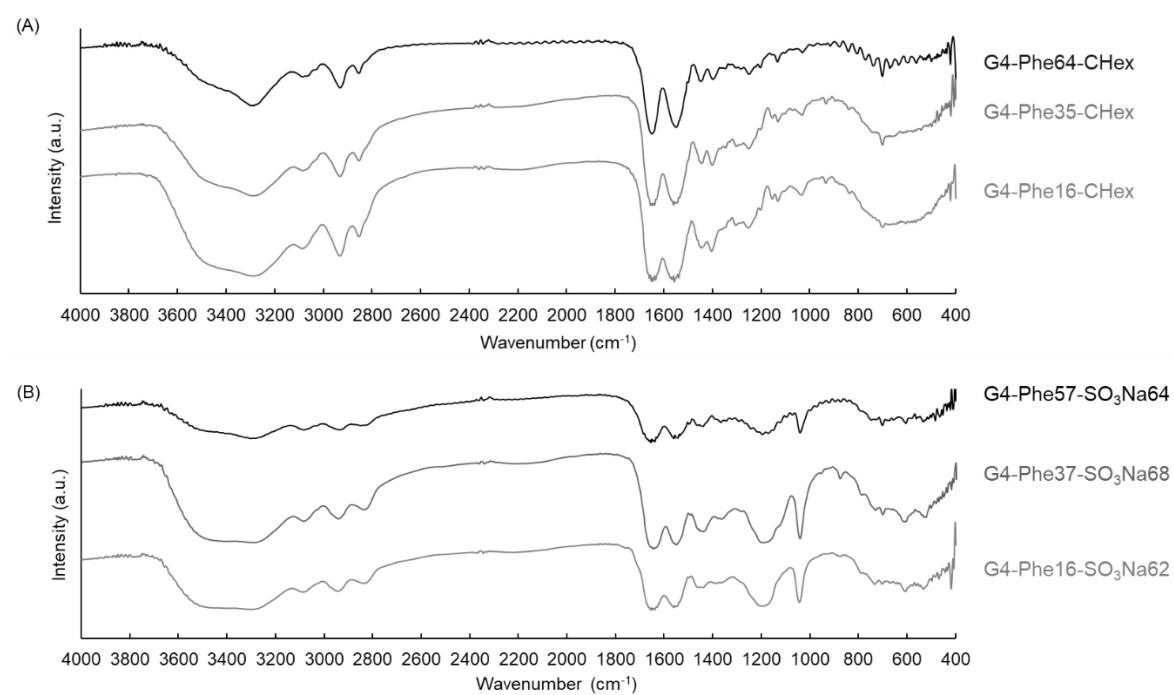

Figure S22. FT-IR spectra of PAMAM-Phe-CHex (A) and PAMAM-Phe- $\text{SO}_3\text{Na}$  (B).

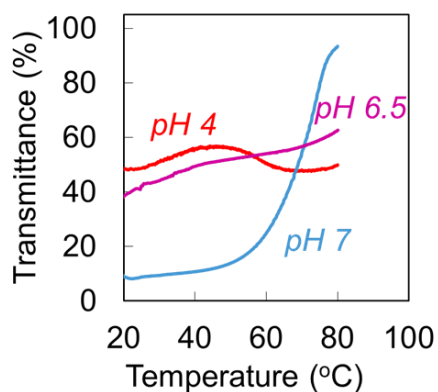

Figure S23. Temperature-dependent transmittance curves of dendrigraft polylysine (G3, 123 termini)-Phe123-SO<sub>3</sub>Na85 in different pHs (1 mg/mL).

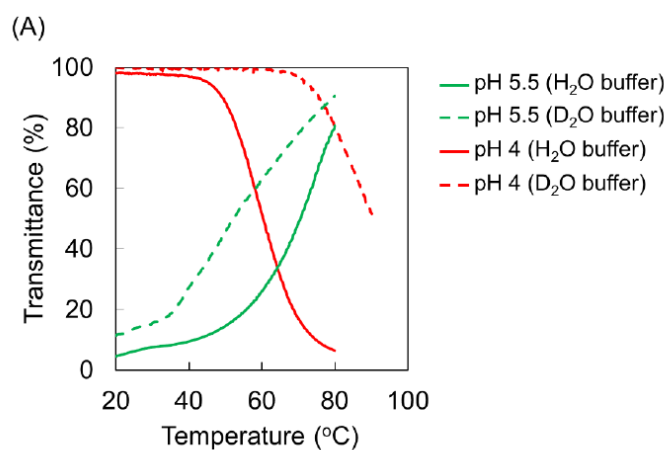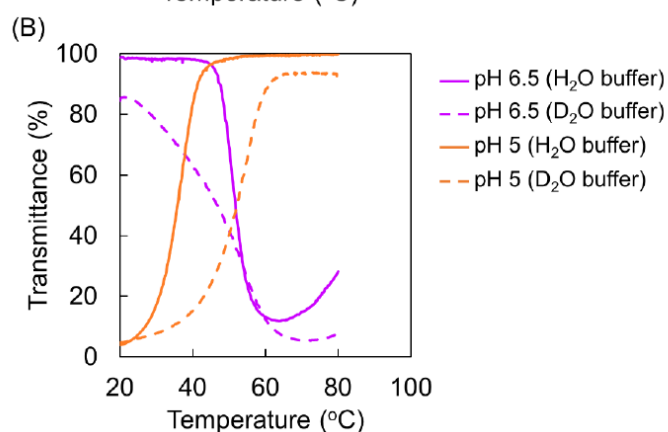

Figure S24. Temperature-dependent transmittance curves of PAMAM-Phe-Suc (A) and PAMAM-Phe-SO<sub>3</sub>Na (B) in H<sub>2</sub>O and D<sub>2</sub>O buffers (1 mg/mL).

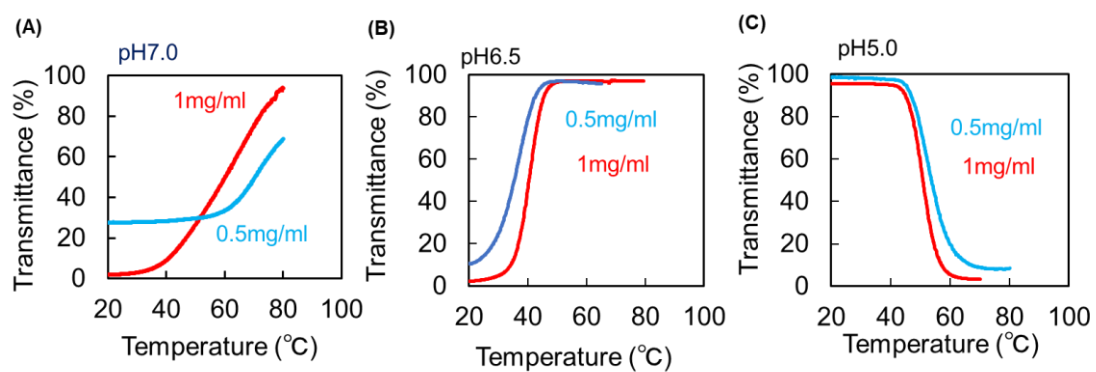

Figure S25. Temperature-dependent transmittance curves of PAMAM-Phe-CHex (A) and PAMAM-Phe-SO<sub>3</sub>Na (B,C) at different dendrimer concentrations in different pHs.
